# Supplementary material for: Tobacco Transcription Factor NtWRKY70b Facilitates Leaf Senescence via Inducing ROS Accumulation and Impairing Hydrogen Sulfide Biosynthesis
Source: MDPI journal article supplement (doi:10.3390/ijms25073686), 2024-03-26
Supplement: s1 [file s1]

---

**Supplementary Table S1.** The GenBank accession numbers of NtWRKY70b and its close homologues proteins.

| Name     | Accession      | Name      | Accession      |
|----------|----------------|-----------|----------------|
| AtWRKY70 | AAL13046.1     | NtWRKY70b | XP_016436463.1 |
| StWRKY70 | XP_015158414.1 | VrWRKY70  | KAJ9694195.1   |
| MnWRKY70 | XP_010098011.1 | HuWRKY70  | XP_021290890.1 |
| CsWRKY70 | KAH9673391.1   | PtWRKY70  | KAG6769652.1   |
| CsWRKY70 | KAF5941069.1   | LtWRKY70  | GLL27008.1     |
| MeWRKY70 | XP_021622706.1 | HbWRKY70  | XP_021664309.2 |
| PtWRKY70 | XP_002323675.2 | InWRKY70  | XP_019186254.1 |
| CaWRKY70 | XP_016543153.1 | EgCAT1    | XP_010051967.2 |

---

**Supplementary Table S2.** The qRT-PCR Primers sequences used in this study.

| Name      | Forward primers (5'-3')                          | Reverse primers (5'-3')                            |
|-----------|--------------------------------------------------|----------------------------------------------------|
| NtWRKY70b | 5'-ATCCTCTAGAGTCGAATGAAGAAGCCAT<br>TAGTTCATGA-3' | 5'-ATGCCTGCAGGTCGATCAAGAAAACCTCTAT<br>GGCCTCATC-3' |
| NtActin   | 5'-ACCTCTATGGCAACATTGTGCTCAG-3'                  | 5'-CTGGGAGCCAAAGCGGTGATT-3'                        |
| NtCP1     | 5'-CAGTGGCTAATCAACCTGTTTCGG-3'                   | 5'-ACACCACTTGAATAGAACTGGAAATCG-3'                  |
| NtRBCS    | 5'-CGAAACTCTCTCATACCTTCCCGA-3'                   | 5'-CATGGTCCAGTATCTGCCGTCATA-3'                     |
| NtSOD     | 5'-CTCCTACCGTCGCCAAAT-3'                         | 5'-GCCCAACCAAGAGAACCC-3'                           |
| NtCAT     | 5'-AGGTACCGCTCATTACACC-3'                        | 5'-AAGCAAGCTTTTGACCCAGA-3'                         |
| NtPPH     | 5'- AGAATCTTTTAAACTGCCATCAA -3'                  | 5'- AATGAATTTTGTGGCCTCGCCAT-3'                     |
| NtRbohD   | 5'- -CAACAGCCACGTCCTTTTGA -3'                    | 5'- CCCGAGGAAGTAAGCCATCT -3'                       |
| NtRbohE   | 5'- TTCGGAAAATCATCACCCGC -3'                     | 5'- ATCATCATTGGACTTGGCGC -3'                       |
| NtDCD1    | 5'- CAGCTCACCATTTTCTTTGCAAC -3'                  | 5'- AGTCAGCCCCCTGTGCCACAGCAT -3'                   |
| NtCYSC1   | 5'- GCATTTATGGCAGCAATGAAA -3'                    | 5'- CTCAGGACCAGTCGTCTCAA -3'                       |
