# Supplementary material for: Tobacco Transcription Factor NtWRKY70b Facilitates Leaf Senescence via Inducing ROS Accumulation and Impairing Hydrogen Sulfide Biosynthesis
Source: MDPI journal article supplement (doi:10.3390/ijms25073686), 2024-03-26
Supplement: s1 [file s1]

*NtRbohD* promoter sequence

GTAGTTGTCTACGTCGTTGCGGCAACTGTGGAGTATAAATTATTGAGATAACATTAGTCTTAAAATAAATTTATTTGAAGAAAA  
ATAAGAATAAGGGCGTGAATAACAACGGCATGGGCATGCATGTATCGGTAAAATAATGCATATGACATAAACAAAAATATTC  
TTTGGTCAAACAAAGACCTACCCCTTCATTTCTAGCTCTCGCCCTTTTTCTTTTTCTTTTTCAACAGAATGCGGCTTCTTC  
CCACCAATTATATAACTAAAGTTGAAGGCCGAAGGAACGACCCTTCTGTATTCTGCTTGGAACAAGAAAAATCCCAATCTT  
TTATTTGTTTATTAATAATTAGTACGCCAAGAAAGAAAGAAAGAAAGACAGAAAGACTCGGTCTTCTTTCTCTCTTGGTCTG  
AAACTCCAAAATAGAATACCAATTATTAATCTTTTGTCATCTTTTCTCTTCT

*NtPPH* promoter sequence

GAGTTATGGCAGTAAATTCATACGGTTGGCTAAACAGAACTATGCGATAAGATATAGCAATATTCGTGAATTCAACA  
AAGTACCCAGCGAACAACTTCAGTACACTGATAAATGCCCAAAGGAACATCTTTATCAAGATCTACATATGAAACCT  
AGATATTGGGCACACTTACAAAGGTCAAATCGTACAGGATGCATAATGGAAGGTAGAAACAATTACGAGATTGGAA  
GGATTCCGACTACAGGTTGTGGTGTGATAAGGAAGCCTAAGGGGGGAGTGACCTGAACCTTTGGATTATTACAGAA  
CAACTGCCTAAATGGCAAGGAAAGTATTGAGGTATTCACAAGAGCTATAAGTTATGAAAATGATAAGGGCATCAGT  
CAACATTCGAGGACGAATGTTCAAAAGGGGAATAATGTTACGCCCCGCAATATTACATCGATATCACGTTTCACA  
ATATTAAGTTACGACAATGTTGCACCCTGAAGTATTAACGTGGAATTTGTCGTAAGGTAATTGACATCAGTCCAAG  
TAAAAGATTATTTGGAGGTTATAAGGATTATGCTATTTCAACAAGTGATTAGTAAATTCGTGAAGGTGAGAAGGGAAG  
CAAGTCGAAGAAAATGAATTCGTTAAAATATTTAAGAGACTAAATATGCTCAGGGTTATATTTGAGGGACCAAAAT  
AGACATACCCTCAAAGATAAGAGACAATATTGGCCAAAACTCTTCAAGAGCTCATGATAATTTCAAATTTACAAA  
ACCTTTCTATTAATAATTAATGTAAACAAGTATTTTCAATAATTCGAACTACACATTATAATACTTTATAGTTCATAT  
CGACTAAATTTGACCATTTCTGTTTACTTATACGTAACTAATTAATGTAAGGGAAGTAAATTTCTTTATGTAATAATA  
AGAACATCCTTATATAACAATGCTTCACTATAAAAGTTAAATTTTTCGGAACCACATATTATGTTTTGTTATAATAT  
ATGTTCTCTATAATAACAATTCA

Supplementary Figure S2. W-box in these promoter of *NtRbohD* and *NtPPH*. W-box: the red font highlighted in the background.
