# Supplementary material for: Tobacco Transcription Factor NtWRKY70b Facilitates Leaf Senescence via Inducing ROS Accumulation and Impairing Hydrogen Sulfide Biosynthesis
Source: MDPI journal article supplement (doi:10.3390/ijms25073686), 2024-03-26
Supplement: s1 [file s1]

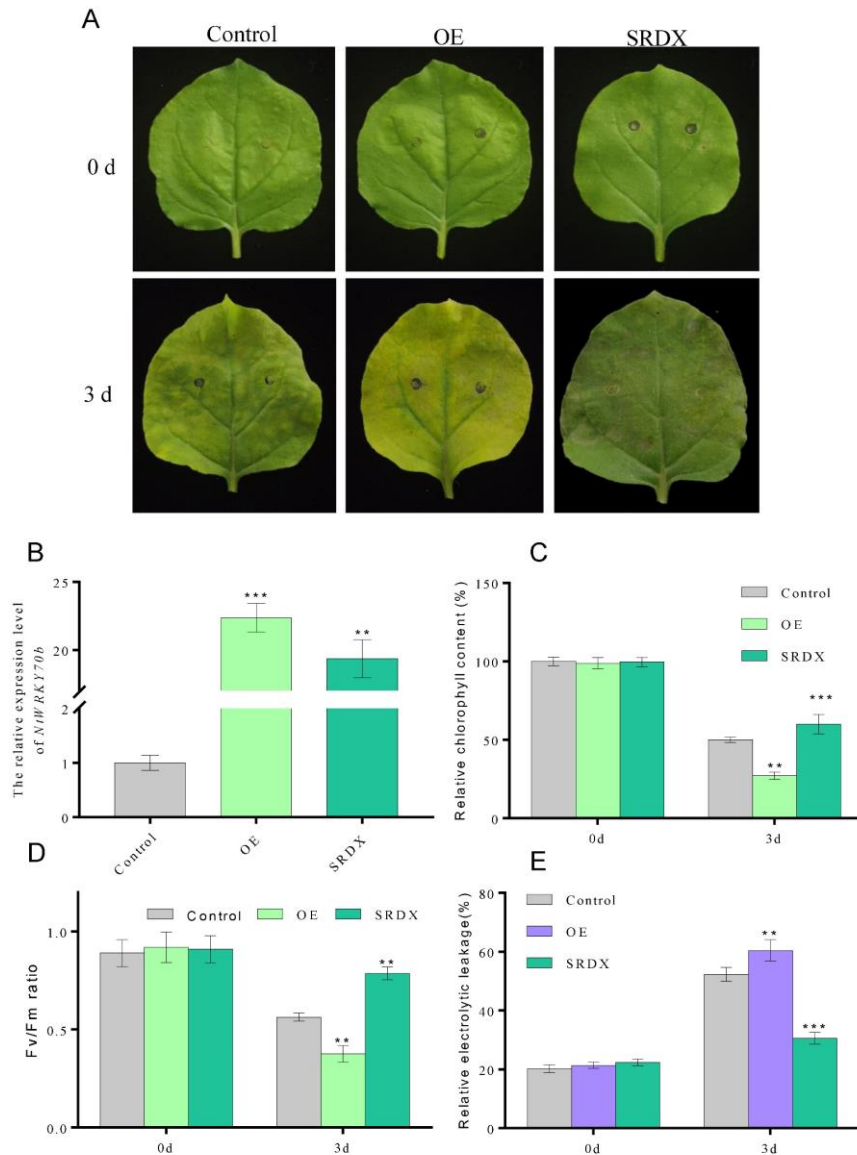

Supplementary Figure S1. Phenotypic analysis of transiently transformed leaves under dark conditions. (A) Phenotype observation of these transiently transformed leaves under darkness for 3 days. (B) The expression level of *NtWRKY70b* in transiently transformed tobacco leaves. (C) chlorophyll content (D) *Fv/Fm* (E) ion leakage rate. Three biological repeats were performed. Error bars indicate standard deviation ( $n=10$ ). Asterisks indicate significant differences (Student's *t* test, \*\* $p < 0.01$ , \*\*\* $p < 0.001$ ) with corresponding controls
